# Supplementary material
Source: PubMed Central journal article supplement (PMC6697087)
Supplement: NIHMS1531916-supplement-2.pdf [file NIHMS1531916-supplement-2.pdf]

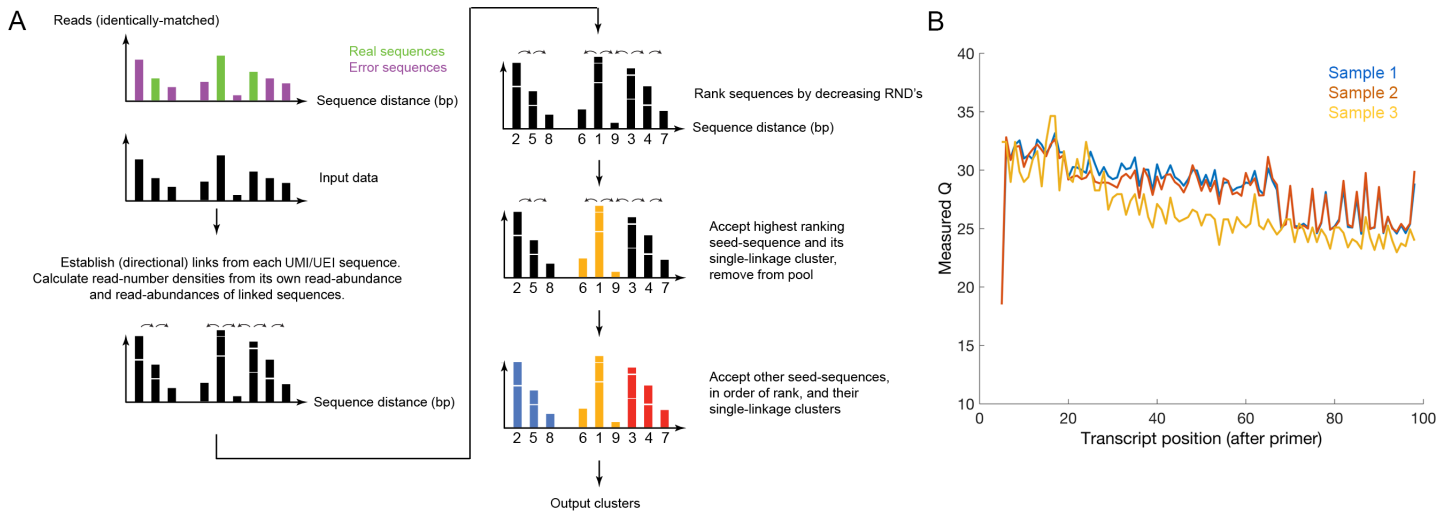

**FIGURE S2: Sequence-error handling at the level of UMIs, UEIs, and transcript inserts, related to Figure 1.** (A) An illustration of the EASL clustering method for UMI and UEI sequence clustering in log-linear time. (B) Quality score ( $-10 \log_{10} \text{Prob}(\text{incorrect})$ ) dependence on position for target amplicons belonging to GFP and RFP *after the annealing primers* in Table S1. Samples 1, 2, and 3 (blue, red, and yellow, respectively) were sequenced out to  $\sim 100$  bp past the annealing primer site, and they are therefore shown here. Plot begins  $\sim 5$  bp into the transcript, since the first 5 bp were used during initial read-filtering.
