# Supplementary material
Source: PubMed Central journal article supplement (PMC6697087)
Supplement: NIHMS1531916-supplement-3.pdf [file NIHMS1531916-supplement-3.pdf]

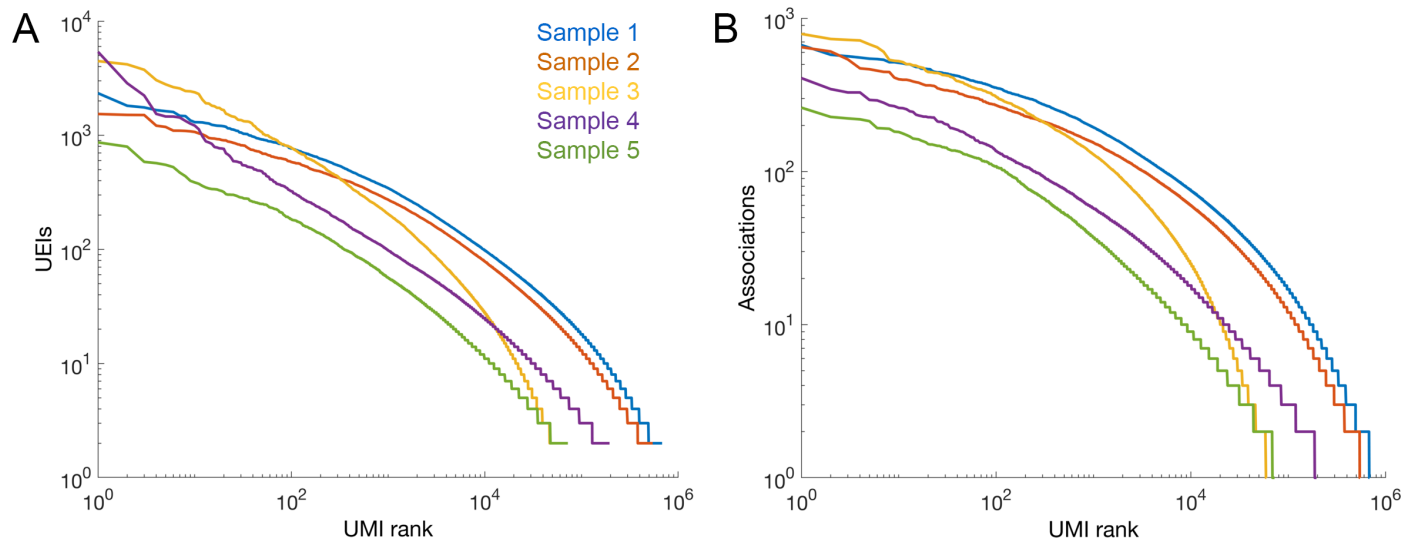

**FIGURE S3: Distribution of UEIs across UMIs, related to Figures 2-3.** (A) Rank-order plot of UEIs for each UMI (having a minimum of 2 due to filtering described under **Quantification and statistical analysis: UEI-UMI pairing**). (B) Rank-order plot of associations for each UMI (ie the number of unique UMIs with which each UMI associates).
