# Supplementary material
Source: PubMed Central journal article supplement (PMC6697087)
Supplement: NIHMS1531916-supplement-5.pdf [file NIHMS1531916-supplement-5.pdf]

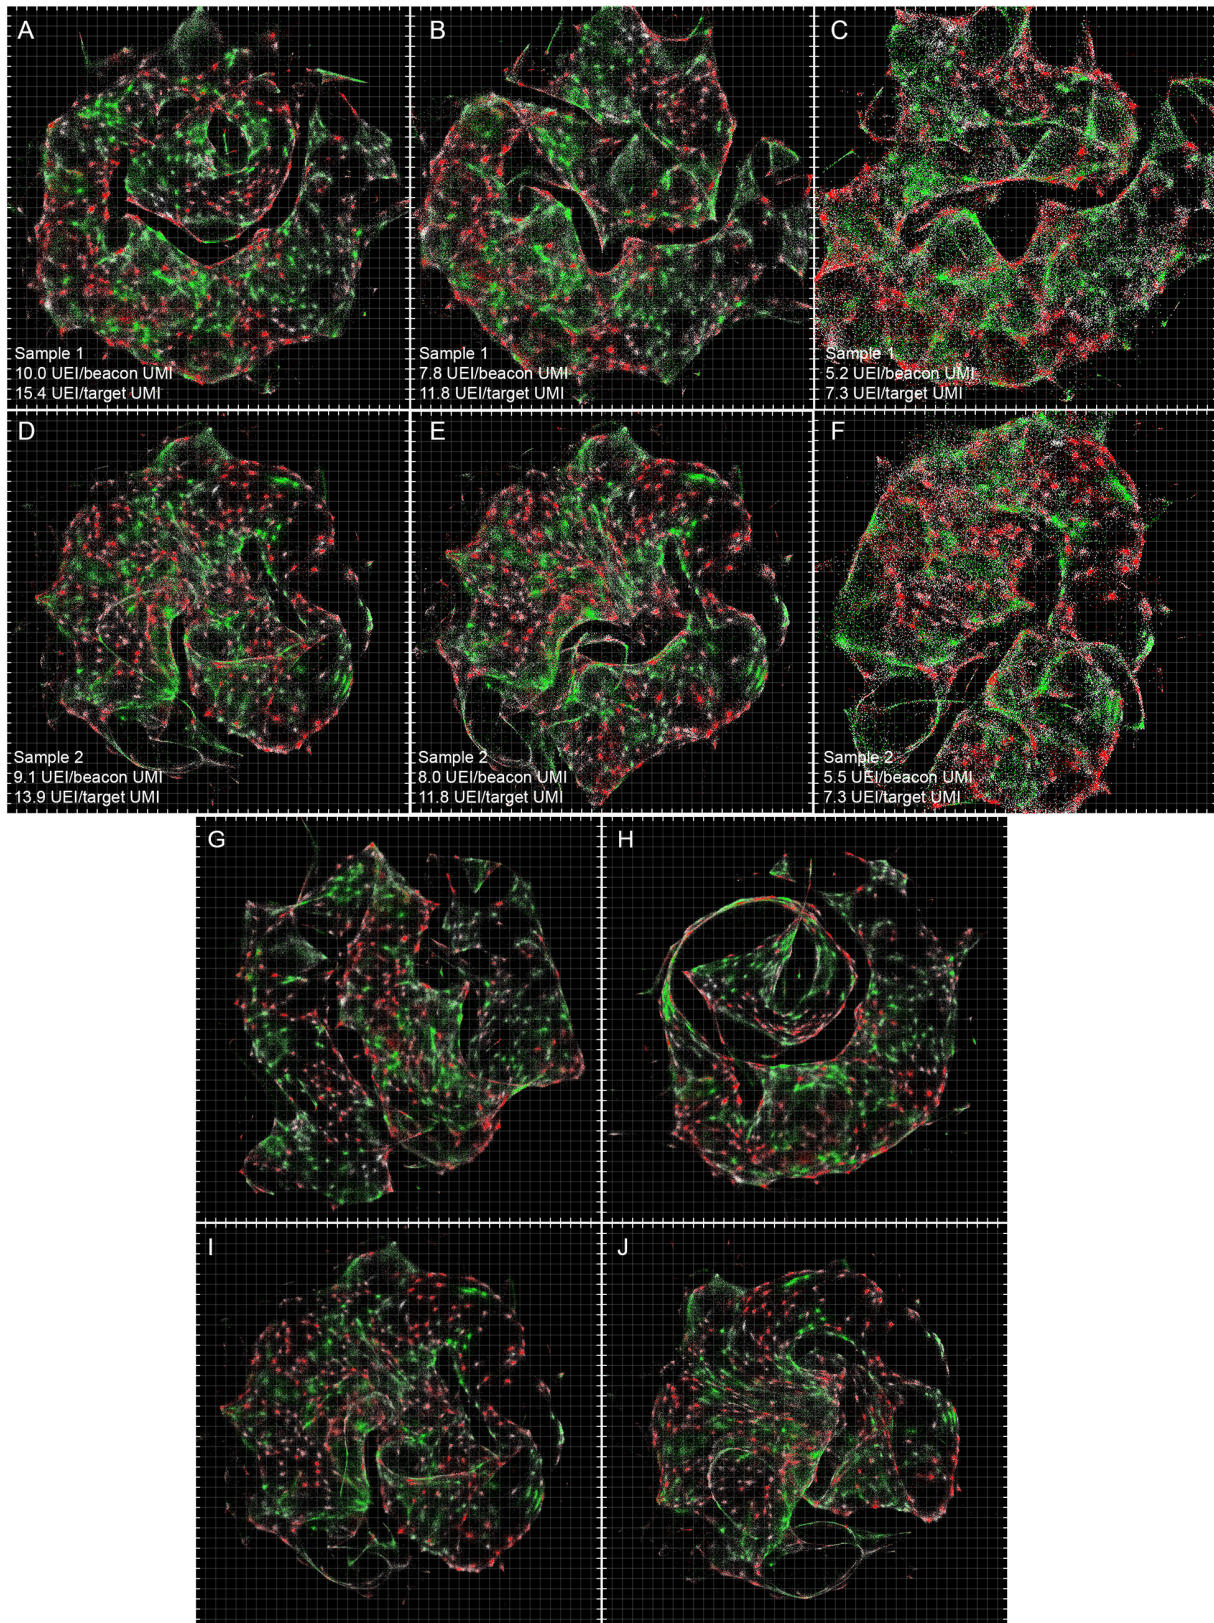

**FIGURE S5: Data down-sampling and re-parameterization of sMLE inference, related to Figure 5.** Down-sampling of samples 1 and 2 at various read-depths (A-C and D-F, respectively). A and D correspond to all-inclusive data-sets (20273379 retained reads for sample 1, 16248577 retained reads for sample 2). B and E correspond to 12800000 sub-sampled reads and C and F correspond to 6400000 sub-sampled reads. sMLE-initialization to  $\mathbf{I}_{2 \times 2} \sqrt{n}$  for samples 1 (G) and 2 (I), instead of initialization to just the identity matrix  $\mathbf{I}_{2 \times 2}$ , the conditions used in panels A and F. sMLE inference stopped at 50 (instead of 100) eigenvectors for samples 1 (H) and 2 (J).
