# Supplementary material
Source: PubMed Central journal article supplement (PMC6697087)
Supplement: NIHMS1531916-supplement-7.pdf [file NIHMS1531916-supplement-7.pdf]

|                 |                                                                                            |
|-----------------|--------------------------------------------------------------------------------------------|
| Sample          | SAMPLE1                                                                                    |
| Barcode         | i388                                                                                       |
| Run, R1, R2     | i388_run1, 103, 151                                                                        |
| Run, R1, R2     | i388_run2, 103, 151                                                                        |
| Run, R1, R2     | i388_run3, 103, 151                                                                        |
| Beacon RT oligo | ggtgtcctaaacttacgcNNNNNNNWSNNNWWWNNNSWWNNNNNNNTCAGATCGGAAGAGCGTCGAGAGAAGTGGGGTGGCTTN       |
| Beacon RT oligo | ggtgtcctaaacttacgcNNNNNNNWSNNNWWWNNNSWWNNNNNNNTCAGAGATCGGAAGAGCGTCGAGAGAAGTGGGGTGGCTTN     |
| Beacon RT oligo | ggtgtcctaaacttacgcNNNNNNNWSNNNWWWNNNSWWNNNNNNNTCAGTCAGATCGGAAGAGCGTCGAGAGAAGTGGGGTGGCTTN   |
| Target RT oligo | TGTGCTCTCCGATCTTNNNNNNNWSNNNWWWNNNSWWNNNNNNNTCTTACTCCTGGAGGCCATGT                          |
| Target RT oligo | TGTGCTCTCCGATCTGANNNNNNNWSNNNWWWNNNSWWNNNNNNNTCTTGAAGTTCACCTTGATGC                         |
| Target RT oligo | TGTGCTCTCCGATCTACTNNNNNNNWSNNNWWWNNNSWWNNNNNNCCATGGTCTTCTTCTGCATT                          |
| Sample          | SAMPLE2                                                                                    |
| Barcode         | i786, 103, 151                                                                             |
| Run, R1, R2     | i786_run1, 103, 151                                                                        |
| Run, R1, R2     | i786_run2, 103, 151                                                                        |
| Run, R1, R2     | i786_run3, 103, 151                                                                        |
| Beacon RT oligo | ggtgtcctaaacttacgcTNNNNNNNWSNNNWWWNNNSWWNNNNNNNAAGATCGGAAGAGCGTCGAGAGAAGTGGGGTGGCTTN       |
| Beacon RT oligo | ggtgtcctaaacttacgcNNNNNNNWSNNNWWWNNNSWWNNNNNNNAGTAGATCGGAAGAGCGTCGAGAGAAGTGGGGTGGCTTN      |
| Beacon RT oligo | ggtgtcctaaacttacgcNNNNNNNWSNNNWWWNNNSWWNNNNNNNAGTCAAGATCGGAAGAGCGTCGAGAGAAGTGGGGTGGCTTN    |
| Target RT oligo | TGTGCTCTCCGATCTTNNNNNNNWSNNNWWWNNNSWWNNNNNNNTCTTACTCCTGGAGGCCATGT                          |
| Target RT oligo | TGTGCTCTCCGATCTGANNNNNNNWSNNNWWWNNNSWWNNNNNNNATCTTGAAGTTCACCTTGATGC                        |
| Target RT oligo | TGTGCTCTCCGATCTACTNNNNNNNWSNNNWWWNNNSWWNNNNNNCCATGGTCTTCTTCTGCATT                          |
| Sample          | SAMPLE3                                                                                    |
| Barcode         | i289                                                                                       |
| Run, R1, R2     | i289, 103, 151                                                                             |
| Beacon RT oligo | GAGGTGTCCTAAACTTACGCTNNNNNNNWSNNNWWWNNNSWWNNNNNNNACAGATCGGAAGAGCGTCGAGAGAAGTGGGGTGGCTTN    |
| Beacon RT oligo | GAGGTGTCCTAAACTTACGCNNNNNNNWSNNNWWWNNNSWWNNNNNNNACTGAGATCGGAAGAGCGTCGAGAGAAGTGGGGTGGCTTN   |
| Beacon RT oligo | GAGGTGTCCTAAACTTACGCNNNNNNNWSNNNWWWNNNSWWNNNNNNNACTGACAGATCGGAAGAGCGTCGAGAGAAGTGGGGTGGCTTN |
| Target RT oligo | CGTGTGCTCTCCGATCTACTNNNNNNNWSNNNWWWNNNSWWNNNNNNNTACTCCTGGAGGCCATGT                         |
| Target RT oligo | CGTGTGCTCTCCGATCTTNNNNNNNWSNNNWWWNNNSWWNNNNNNNTCTTGAAGTTCACCTTGATGC                        |
| Target RT oligo | CGTGTGCTCTCCGATCTGANNNNNNNWSNNNWWWNNNSWWNNNNNNNACCATGGTCTTCTTCTGCATT                       |

**TABLE S1: Oligonucleotides used for each sample during 4-plex (ACTB, GAPDH, GFP, RFP) reverse transcription, related to Figures 2, 4-6, and 5.** Lower case nucleotides indicate sequence areas during read parsing for which a 6% error rate is accepted, whereas upper case nucleotides afford zero error tolerance. Read-lengths labeled R1 (beginning at the 3' end of the beacon UMI) and R2 (beginning at the 5' end of the target UMI) are shown. All reverse transcription oligonucleotides were obtained as ultramers from IDT Inc.
