# Supplementary material
Source: PubMed Central journal article supplement (PMC6697087)
Supplement: NIHMS1531916-supplement-8.pdf [file NIHMS1531916-supplement-8.pdf]

|                 |                                                                     |
|-----------------|---------------------------------------------------------------------|
| OE1a            | /5Acryd/tattcccatggcgcgccaNNNNNATNNNNNttgaggtgtcctaacttacgc         |
| OE4b            | /5Acryd/ggcgcgccatgggaataaNNNNNATNNNNNtgagtggtctcaacatatcgc         |
| psbs12s         | G TTCAGACGTGTGCTCTTCCGATCT                                          |
| s8B             | ATGAGTGGCTTCAAATTCACGC                                              |
| s4B17-GAPDH-LF3 | TGGTCTCAACATATCGCATGACATCAAGAAGGTGGTGAAGCAGGC                       |
| s4B17-RFP-LF2B  | TGGTCTCAACATATCGCTCAGTTCATGTACGGCTCCAAGGCCTAC                       |
| s4B17-GFP-LF1B  | TGGTCTCAACATATCGCACCATCTTCTTCAAGGACGACGGCAACT                       |
| s8B17-actb-LF1  | TGGCTTCAAATTCACGCAAACCTGGAACGGTGAAGGTGACAGCAG                       |
| SBS3LC          | CCC ACTTCTCTCGACGCTCTTCCGATCT                                       |
| rev-ill-214     | CAAGCAGAAGACGGCATAACGAGATAGGATCTAGTGACTGGAGTTCAGACGTGTGCTCTTCCGATCT |
| for-ill-sbs3    | AATGATACGGCGACCACCGAGATCTACACTCTTTCCCTACACGACGCTCTTCCGATCT          |
| 10T-OEc-P       | TTTTTTTTTTTTATTCCCATGGCGGCCA/3Phos/                                 |
| 10T-OE-P        | TTTTTTTTTTTTGGCGGCCATGGGAATAA/3Phos/                                |

**TABLE S2: Oligonucleotides used for all samples during amplification and library preparation, related to Figures 4-6 and Figure S5.** Lower case nucleotides indicate sequence areas during read parsing for which a 6% error rate is accepted, whereas upper case nucleotides afford zero error tolerance. 5'-acrydite modified oligonucleotides were HPLC-purified by the manufacturer.
