# Supplementary material
Source: PubMed Central journal article supplement (PMC6697087)
Supplement: NIHMS1531916-supplement-9.pdf [file NIHMS1531916-supplement-9.pdf]

| Sample | Total sequenced | Fraction retained | Beacon UMIs (>1 read) | Target UMIs (>1 read) | UEIs (>1 read) |
|--------|-----------------|-------------------|-----------------------|-----------------------|----------------|
| 1      | 26832238        | 0.76              | 892372                | 535216                | 5056844        |
| 2      | 21355785        | 0.76              | 898039                | 488100                | 3915689        |
| 3      | 34846809        | 0.60              | 63857                 | 31960                 | 732428         |
| 4      | 44032216        | 0.82*             | 402575                | 109482                | 1291422        |
| 5      | 42669570        | 0.85*             | 152875                | 48577                 | 457148         |

| Sample | Beacon UMIs (MLE) | Target UMIs (MLE) | UEIs (MLE) | UEI/Beacon UMI (MLE) | UEI/Target UMI (MLE) |
|--------|-------------------|-------------------|------------|----------------------|----------------------|
| 1      | 413574            | 268752            | 4149473    | 10.0                 | 15.4                 |
| 2      | 329848            | 215285            | 2989182    | 9.1                  | 13.9                 |
| 3      | 38307             | 21192             | 695307     | 18.2                 | 32.8                 |
| 4      | 146653            | 48354             | 757502     | 5.2                  | 15.7                 |
| 5      | 52359             | 19951             | 274540     | 5.2                  | 13.8                 |

**TABLE S3: Read and UMI/UEI counts for all samples, related to Figures 2, 4-6, 5.** Columns labeled “>1 read” denote status of UMIs/UEIs identified by independent clustering, whereas columns labeled “MLE” denote those that made it into the final UEI matrices for image inference. “UEI/Beacon UMI” and “UEI/Target UMI” denote ratios, important for analyzing data quality in the context of resolution defined in equation 13. Asterisks denote 24-plex samples, for which amplicon-filtering was done after UMI/UEI clustering, and therefore those discarded on this basis were not counted during initial read parsing.
