# Supplementary material
Source: PubMed Central journal article supplement (PMC6697087)
Supplement: NIHMS1531916-supplement-10.pdf [file NIHMS1531916-supplement-10.pdf]

|          | Pr( $r$ reads from UMI will produce $\geq 2$ UEIs of $\geq 2$ reads each) |         |         |         |         |         |         |          | Mean error UMI-variants    |          |          |                |
|----------|---------------------------------------------------------------------------|---------|---------|---------|---------|---------|---------|----------|----------------------------|----------|----------|----------------|
|          | SSD of same                                                               |         |         |         |         |         |         |          | Mean reads per UMI-variant |          |          |                |
|          | $\leq 3$ reads                                                            | 4 reads | 5 reads | 6 reads | 7 reads | 8 reads | 9 reads | 10 reads | 1 errors                   | 2 errors | 3 errors | FPR            |
| Sample 1 | 0.0E+00                                                                   | 1.6E-01 | 3.5E-01 | 5.3E-01 | 6.6E-01 | 7.5E-01 | 8.2E-01 | 8.6E-01  | 9.4E-01                    | 1.4E-02  | 4.8E-05  | <b>9.5E-05</b> |
|          | 0.0E+00                                                                   | 4.2E-04 | 4.9E-04 | 4.6E-04 | 4.1E-04 | 2.9E-04 | 4.6E-04 | 2.9E-04  | 1.7E+00                    | 1.2E+00  | 1.0E+00  |                |
| Sample 2 | 0.0E+00                                                                   | 1.7E-01 | 3.7E-01 | 5.5E-01 | 6.8E-01 | 7.7E-01 | 8.4E-01 | 8.8E-01  | 9.4E-01                    | 1.3E-02  | 3.1E-05  | <b>9.3E-05</b> |
|          | 0.0E+00                                                                   | 6.3E-04 | 5.7E-04 | 3.5E-04 | 3.9E-04 | 4.0E-04 | 3.7E-04 | 4.3E-04  | 1.7E+00                    | 1.2E+00  | 1.0E+00  |                |
| Sample 3 | 0.0E+00                                                                   | 1.1E-01 | 2.5E-01 | 3.9E-01 | 5.0E-01 | 6.0E-01 | 6.7E-01 | 7.3E-01  | 6.3E+00                    | 3.6E-01  | 3.5E-03  | <b>1.3E-03</b> |
|          | 0.0E+00                                                                   | 1.1E-03 | 1.7E-03 | 1.2E-03 | 2.3E-03 | 1.8E-03 | 9.2E-04 | 1.1E-03  | 3.2E+00                    | 1.1E+00  | 1.0E+00  |                |
| Sample 4 | 0.0E+00                                                                   | 1.5E-01 | 3.2E-01 | 4.7E-01 | 5.9E-01 | 6.7E-01 | 7.4E-01 | 7.8E-01  | 3.1E+00                    | 6.2E-02  | 1.8E-04  | <b>3.3E-04</b> |
|          | 0.0E+00                                                                   | 7.4E-04 | 7.8E-04 | 1.0E-03 | 7.0E-04 | 9.9E-04 | 8.0E-04 | 9.8E-04  | 2.0E+00                    | 1.1E+00  | 1.0E+00  |                |
| Sample 5 | 0.0E+00                                                                   | 1.5E-01 | 3.3E-01 | 4.8E-01 | 5.9E-01 | 6.7E-01 | 7.4E-01 | 7.8E-01  | 7.5E+00                    | 2.4E-01  | 1.6E-03  | <b>1.5E-03</b> |
|          | 0.0E+00                                                                   | 8.8E-04 | 1.9E-03 | 1.8E-03 | 1.2E-03 | 1.2E-03 | 1.6E-03 | 9.2E-04  | 2.5E+00                    | 1.2E+00  | 1.1E+00  |                |

**TABLE S4: False-positive rate estimates for each sample using equation 3, related to Figures 2, 4-6, and 5.** “Mean error UMI-variants” corresponds to quantity  $\mu_k$ , with  $k$  being the number of errors, and “mean reads per UMI-variant” corresponds to quantity  $\mu_{R,k}$ . FPR is then the estimated fraction of UMIs that are mistakenly identified as real in the final data set.
