# Supplementary material
Source: PubMed Central journal article supplement (PMC6697087)
Supplement: NIHMS1531916-supplement-11.pdf [file NIHMS1531916-supplement-11.pdf]

| Sample          | SAMPLE4                                                                                   |          |
|-----------------|-------------------------------------------------------------------------------------------|----------|
| Barcode         | i800                                                                                      |          |
| Run, R1, R2     | i800_run1, 103, 57                                                                        |          |
| Run, R1, R2     | i800_run2, 103, 151                                                                       |          |
| Beacon RT oligo | ggtgtcctaacttaacgcnnnnnnnnwssnnnnnnwswnnnnnnntcagatcgggaagacgctcgagagaagtggggtggctttt     | ACTB     |
| Beacon RT oligo | ggtgtcctaacttaacgcnnnnnnnnwssnnnnnnwswnnnnnnntcgaagatcgggaagacgctcgagagaagtggggtggctttt   | ACTB     |
| Beacon RT oligo | ggtgtcctaacttaacgcnnnnnnnnwssnnnnnnwswnnnnnnntcagtcagatcgggaagacgctcgagagaagtggggtggctttt | ACTB     |
| Target RT oligo | GGAGTTCAGACGTGTGCTCTCCGATCTACTNNNNNNWSSNNNNWNNNSWNNNNNNNTTACTCCTTGGAGCCATGT               | GAPDH    |
| Target RT oligo | GGAGTTCAGACGTGTGCTCTCCGATCTANNNNNNWSSNNNNWNNNSWNNNNNNNTCTCTGAAGTTCACCTTGATGC              | GFP      |
| Target RT oligo | GGAGTTCAGACGTGTGCTCTCCGATCTGANNNNNNWSSNNNNWNNNSWNNNNNNNACCATGGTCTTCTTCTGCATT              | RFP      |
| Target RT oligo | GGAGTTCAGACGTGTGCTCTCCGATCTACTNNNNNNWSSNNNNWNNNSWNNNNNNNAGACGGAGAAGTCCACGATCT             | GRIN2D   |
| Target RT oligo | GGAGTTCAGACGTGTGCTCTCCGATCTTNNNNNNWSSNNNNWNNNSWNNNNNNNATGGCCAAAGTCCGCTATCTTG              | CDK20    |
| Target RT oligo | GGAGTTCAGACGTGTGCTCTCCGATCTANNNNNNWSSNNNNWNNNSWNNNNNNNATGCCCTGGGTCTTACTCAC                | TMEM234  |
| Target RT oligo | GGAGTTCAGACGTGTGCTCTCCGATCTACTNNNNNNWSSNNNNWNNNSWNNNNNNNATCCAAAGACCCGCTTCATC              | FAM127B  |
| Target RT oligo | GGAGTTCAGACGTGTGCTCTCCGATCTTNNNNNNWSSNNNNWNNNSWNNNNNNNTCTCACCAGCACTCCAACAG                | HACD1    |
| Target RT oligo | GGAGTTCAGACGTGTGCTCTCCGATCTGANNNNNNWSSNNNNWNNNSWNNNNNNNATAGCGCTCGCTCAGGTAGA               | IER5L    |
| Target RT oligo | GGAGTTCAGACGTGTGCTCTCCGATCTANNNNNNWSSNNNNWNNNSWNNNNNNNGTCTCTGGGCAAGGGCTTC                 | CDK25B   |
| Target RT oligo | GGAGTTCAGACGTGTGCTCTCCGATCTTNNNNNNWSSNNNNWNNNSWNNNNNNNTAGATGGCAAAGACTTCAAC                | POLR1E   |
| Target RT oligo | GGAGTTCAGACGTGTGCTCTCCGATCTGANNNNNNWSSNNNNWNNNSWNNNNNNNATCTGGGTCCACGAGGT                  | SECTM1   |
| Target RT oligo | GGAGTTCAGACGTGTGCTCTCCGATCTANNNNNNWSSNNNNWNNNSWNNNNNNNTGTGCCTCCCTTGCTGG                   | FAM3A    |
| Target RT oligo | GGAGTTCAGACGTGTGCTCTCCGATCTTNNNNNNWSSNNNNWNNNSWNNNNNNNTCTCATGCGCAGAAAACAGTC               | C6ORF52  |
| Target RT oligo | GGAGTTCAGACGTGTGCTCTCCGATCTGANNNNNNWSSNNNNWNNNSWNNNNNNNATGGGTGGGAGGAGTATTTC               | PLP2     |
| Target RT oligo | GGAGTTCAGACGTGTGCTCTCCGATCTACTNNNNNNWSSNNNNWNNNSWNNNNNNNACCTTGATGTGAAAGGGGAGA             | MEA1     |
| Target RT oligo | GGAGTTCAGACGTGTGCTCTCCGATCTTNNNNNNWSSNNNNWNNNSWNNNNNNNTACTGGGAGTAGGACTGGTA                | FAM170B  |
| Target RT oligo | GGAGTTCAGACGTGTGCTCTCCGATCTGANNNNNNWSSNNNNWNNNSWNNNNNNNATCCACCATCTCTCCTTTC                | COL13A1  |
| Target RT oligo | GGAGTTCAGACGTGTGCTCTCCGATCTACTNNNNNNWSSNNNNWNNNSWNNNNNNNACCAGAAAAGCAAGGGCTCAG             | MRPL14   |
| Target RT oligo | GGAGTTCAGACGTGTGCTCTCCGATCTTNNNNNNWSSNNNNWNNNSWNNNNNNNATCCAGGCACCAATCTGA                  | C11ORF44 |
| Target RT oligo | GGAGTTCAGACGTGTGCTCTCCGATCTGANNNNNNWSSNNNNWNNNSWNNNNNNNATCCTGTACAGGCCACGAA                | CCRL2    |
| Target RT oligo | GGAGTTCAGACGTGTGCTCTCCGATCTACTNNNNNNWSSNNNNWNNNSWNNNNNNNAACACATAACCGCAGCGACA              | ZFAND3   |
| Target RT oligo | GGAGTTCAGACGTGTGCTCTCCGATCTTNNNNNNWSSNNNNWNNNSWNNNNNNNTCGCAGTGGCAGAGCAGAGGAT              | RRP36    |

| Sample          | SAMPLE5                                                                                  |          |
|-----------------|------------------------------------------------------------------------------------------|----------|
| Barcode         | i293                                                                                     |          |
| Run, R1, R2     | i293_run1, 103, 57                                                                       |          |
| Run, R1, R2     | i293_run2, 103, 151                                                                      |          |
| Beacon RT oligo | ggtgtcctaacttaacgcnnnnnnnnwssnnnnnnwswnnnnnnntaagatcgggaagacgctcgagagaagtggggtggctttt    | ACTB     |
| Beacon RT oligo | ggtgtcctaacttaacgcnnnnnnnnwssnnnnnnwswnnnnnnntagatagatcgggaagacgctcgagagaagtggggtggctttt | ACTB     |
| Beacon RT oligo | ggtgtcctaacttaacgcnnnnnnnnwssnnnnnnwswnnnnnnntagcaagatcgggaagacgctcgagagaagtggggtggctttt | ACTB     |
| Target RT oligo | GGAGTTCAGACGTGTGCTCTCCGATCTACTNNNNNNWSSNNNNWNNNSWNNNNNNNTTACTCCTTGGAGCCATGT              | GAPDH    |
| Target RT oligo | GGAGTTCAGACGTGTGCTCTCCGATCTANNNNNNWSSNNNNWNNNSWNNNNNNNTCTCTGAAGTTCACCTTGATGC             | GFP      |
| Target RT oligo | GGAGTTCAGACGTGTGCTCTCCGATCTGANNNNNNWSSNNNNWNNNSWNNNNNNNACCATGGTCTTCTTCTGCATT             | RFP      |
| Target RT oligo | GGAGTTCAGACGTGTGCTCTCCGATCTACTNNNNNNWSSNNNNWNNNSWNNNNNNNAGACGGAGAAGTCCACGATCT            | GRIN2D   |
| Target RT oligo | GGAGTTCAGACGTGTGCTCTCCGATCTTNNNNNNWSSNNNNWNNNSWNNNNNNNATGGCCAAAGTCCGCTATCTTG             | CDK20    |
| Target RT oligo | GGAGTTCAGACGTGTGCTCTCCGATCTANNNNNNWSSNNNNWNNNSWNNNNNNNATGCCCTGGGTCTTACTCAC               | TMEM234  |
| Target RT oligo | GGAGTTCAGACGTGTGCTCTCCGATCTACTNNNNNNWSSNNNNWNNNSWNNNNNNNATCCAAAGACCCGCTTCATC             | FAM127B  |
| Target RT oligo | GGAGTTCAGACGTGTGCTCTCCGATCTTNNNNNNWSSNNNNWNNNSWNNNNNNNTCTCACCAGCACTCCAACAG               | HACD1    |
| Target RT oligo | GGAGTTCAGACGTGTGCTCTCCGATCTGANNNNNNWSSNNNNWNNNSWNNNNNNNATAGCGCTCGCTCAGGTAGA              | IER5L    |
| Target RT oligo | GGAGTTCAGACGTGTGCTCTCCGATCTANNNNNNWSSNNNNWNNNSWNNNNNNNGTCTCTGGGCAAGGGCTTC                | CDK25B   |
| Target RT oligo | GGAGTTCAGACGTGTGCTCTCCGATCTTNNNNNNWSSNNNNWNNNSWNNNNNNNTAGATGGCAAAGACTTCAAC               | POLR1E   |
| Target RT oligo | GGAGTTCAGACGTGTGCTCTCCGATCTGANNNNNNWSSNNNNWNNNSWNNNNNNNATCTGGGTCCACGAGGT                 | SECTM1   |
| Target RT oligo | GGAGTTCAGACGTGTGCTCTCCGATCTACTNNNNNNWSSNNNNWNNNSWNNNNNNNTGTGCCTCCCTTGCTGG                | FAM3A    |
| Target RT oligo | GGAGTTCAGACGTGTGCTCTCCGATCTTNNNNNNWSSNNNNWNNNSWNNNNNNNATGGGTGGGAGGAGTATTTC               | C6ORF52  |
| Target RT oligo | GGAGTTCAGACGTGTGCTCTCCGATCTGANNNNNNWSSNNNNWNNNSWNNNNNNNATGGGTGGGAGGAGTATTTC              | PLP2     |
| Target RT oligo | GGAGTTCAGACGTGTGCTCTCCGATCTACTNNNNNNWSSNNNNWNNNSWNNNNNNNACCTTGATGTGAAAGGGGAGA            | MEA1     |
| Target RT oligo | GGAGTTCAGACGTGTGCTCTCCGATCTTNNNNNNWSSNNNNWNNNSWNNNNNNNTACTGGGAGTAGGACTGGTA               | FAM170B  |
| Target RT oligo | GGAGTTCAGACGTGTGCTCTCCGATCTANNNNNNWSSNNNNWNNNSWNNNNNNNATCCACCATCTCTCCTTTC                | COL13A1  |
| Target RT oligo | GGAGTTCAGACGTGTGCTCTCCGATCTACTNNNNNNWSSNNNNWNNNSWNNNNNNNACCAGAAAAGCAAGGGCTCAG            | MRPL14   |
| Target RT oligo | GGAGTTCAGACGTGTGCTCTCCGATCTTNNNNNNWSSNNNNWNNNSWNNNNNNNATCCAGGCACCAATCTGA                 | C11ORF44 |
| Target RT oligo | GGAGTTCAGACGTGTGCTCTCCGATCTGANNNNNNWSSNNNNWNNNSWNNNNNNNATCCTGTACAGGCCACGAA               | CCRL2    |
| Target RT oligo | GGAGTTCAGACGTGTGCTCTCCGATCTACTNNNNNNWSSNNNNWNNNSWNNNNNNNAACACATAACCGCAGCGACA             | ZFAND3   |
| Target RT oligo | GGAGTTCAGACGTGTGCTCTCCGATCTTNNNNNNWSSNNNNWNNNSWNNNNNNNTCGCAGTGGCAGAGCAGAGGAT             | RRP36    |

**TABLE S5: Oligonucleotides used for 24-plex samples during reverse transcription, related to Figure 5.** Genes previously found (see Klijn et al 2015, ranked <http://amp.pharm.mssm.edu/Harmonizome/>, CCLE Cell Line Gene Expression Profiles) enriched in BT-549 cells are highlighted red, and genes previously found enriched in MDA-MB-231 cells are highlighted green. Lower case nucleotides indicate sequence areas during read parsing for which a 6% error rate is accepted, whereas upper case nucleotides afford zero error tolerance. Read-lengths labeled R1 (beginning at the 3' end of the beacon UMI) and R2 (beginning at the 5' end of the target UMI) are shown. All reverse transcription oligonucleotides were obtained as ultramers from IDT Inc.
