# Supplementary material
Source: PubMed Central journal article supplement (PMC6697087)
Supplement: NIHMS1531916-supplement-12.pdf [file NIHMS1531916-supplement-12.pdf]

|                   |                                                              |
|-------------------|--------------------------------------------------------------|
| OE1a              | /5Acryd/tattcccatggcgcgccaNNNNNATNNNNNttgaggtgtcctaaacttacgc |
| OE4b              | /5Acryd/ggcgcgccatgggaataaNNNNNATNNNNNttgaggtgtctcaacatatcgc |
| Lbs12             | GGAGTTCAGACGTGTGCTCTTCCGATCT                                 |
| s8B               | ATGAGTGGCTTCAAATTCACGC                                       |
| s8B-actb-LF1      | ATGAGTGGCTTCAAATTCACGCAAACCTGGAACGGTGAAGGTGACAGCAG           |
| s4B17-GAPDH-sF    | TGGTCTCAACATATCGCAGAAGGTGGTGAAGCAGGC                         |
| s4B17-GFP-sF      | TGGTCTCAACATATCGCTCAAGGACGACGGCAACT                          |
| s4B17-RFP-sF      | TGGTCTCAACATATCGCTACGGCTCCAAGGCCTAC                          |
| s4B17-GRIN2D-sF   | TGGTCTCAACATATCGCTCAACCGAACCCACAGC                           |
| s4B17-CDK20-sF    | TGGTCTCAACATATCGCATGGAGGACAATCAGTATGTGG                      |
| s4B17-TMEM234-sF  | TGGTCTCAACATATCGCTTGAATACTGAGTACCTGATGCC                     |
| s4B17-FAM127B-sF  | TGGTCTCAACATATCGCAGGAACCCGATTCCCTTTC                         |
| s4B17-HACD1-sF    | TGGTCTCAACATATCGCTGCCTTGCTTGAGATAGTTTAC                      |
| s4B17-IER5L-sF    | TGGTCTCAACATATCGCGAACCTCTGACCCGGACTC                         |
| s4B17-CDC25B-sF   | TGGTCTCAACATATCGCATCCGGATCATTCGAAACGAGC                      |
| s4B17-POLR1E-sF   | TGGTCTCAACATATCGCGTGACTGCTCTGGTCAGC                          |
| s4B17-SECTM1-sF   | TGGTCTCAACATATCGCTCAGAATGAAGGCTGGGAC                         |
| s4B17-FAM3A-sF    | TGGTCTCAACATATCGCATGACCCAGCCACCAAGATG                        |
| s4B17-C6ORF52-sF  | TGGTCTCAACATATCGCTCTGTCTGTTAATAGTTTTCTGGG                    |
| s4B17-PLP2-sF     | TGGTCTCAACATATCGCATCCCTGGAGTGATTTCTTCCG                      |
| s4B17-MEA1-sF     | TGGTCTCAACATATCGCATCCATGGACCCAGAACATGTAG                     |
| s4B17-FAM170B-sF  | TGGTCTCAACATATCGCTGCTACTTTCACAGATCACAGG                      |
| s4B17-COL13A1-sF  | TGGTCTCAACATATCGCATCCAGGAACCAAGGGTGAGAAGGG                   |
| s4B17-MRPL14-sF   | TGGTCTCAACATATCGCTTGCAGGACTCGTGAATGG                         |
| s4B17-C11ORF44-sF | TGGTCTCAACATATCGCTCCAGGAGACTACAACCTCAG                       |
| s4B17-CCRL2-sF    | TGGTCTCAACATATCGCATCGATGAGGCAGAGCAATGTG                      |
| s4B17-ZFAND3-sF   | TGGTCTCAACATATCGCATCGAGTAAAGAGGAGTGTGGG                      |
| s4B17-RRP36-sF    | TGGTCTCAACATATCGCTCAGCGAATGGAGCAGC                           |

**TABLE S6: Oligonucleotides used for 24-plex PCR, related to Table S5 and Figure 5.** For PCR, as indicated in Materials and methods, gene-specific primers (each ending here in “sF”) were used at a final concentration of 10 nM each (in contrast to 30 nM each for the oligos in Table S2 used for 4-plex PCR). 5'-acrydite modified oligonucleotides were HPLC-purified by the manufacturer.
